# Supplementary material
Source: Springer Nature journal article supplement (https://www.springermedizin.de/resource/supplementary/12985_2013_2427_MOESM2_ESM.pdf/9607072)

Phenotype 1

Phenotype 2

TF-1

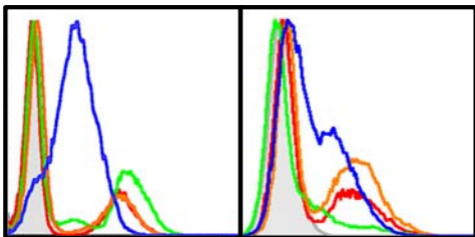

U-937

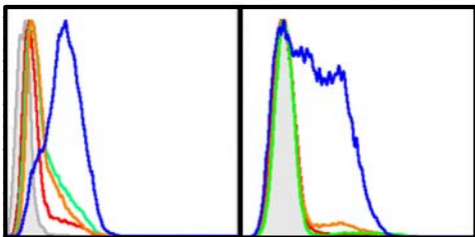

Jurkat

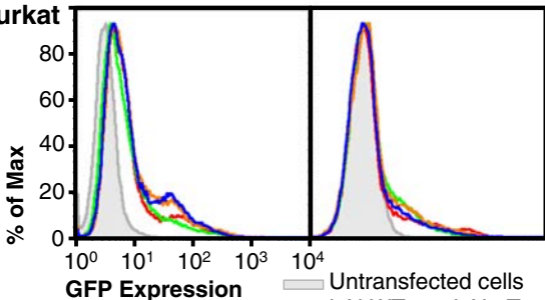

Untransfected cells

LAI WT LAI 5T

LAI 3T LAI 3T5T

Supplement: MOESM2 [file 9607072]
